# Supplementary material for: Remarkable virus diversity and organized community in filter-feeding oysters varied from those of the ocean virome
Source: Research Square preprint supplement (doi:10.21203/rs.3.rs-1344035/v1), 2022-02-11
Supplement: Supplementary file 5 [file 13fde6018748b754e8a0d4b1.xlsx]

## Sheet: Sheet1
Library	Amplification	Sampling_Date	Healthy_Status	Sampling_Site	Species	Tissue_Origin	Raw_Reads_Length	Raw_Reads_Count	Homo_sapiens_Reads_Ratio	C_virginica_Reads_Ratio	C_gigas_Reads_Ratio	Contaminant_Viral_Reads_Ratio	Clean_Reads_Count	Clean_Reads_Ratio	Assambly Group	Count_vOTU	Viral_Reads_Ratio_RefSeq	Viral_Reads_Ratio_vOTU	Richness_RefSeq	Shannon_RefSeq	Simpson_RefSeq	Richness_vOTU	Shannon_vOTU	Simpson_vOTU	Richness_AMG	Shannon_AMG	Simpson_AMG	NMDS1_vOTU	NMDS2_vOTU	Count_DNA_vOTU	Count_RNA_vOTU	Count_unclassified_vOTU	Count_mapped_vOTU
BHos1	RT-WGA	201607	No	BH	C_hk	tissue	301	31231076	0.00750605	0.0354485	0.0474186	1.74807e-05	25091090	0.803401	BH	5364	0.168626	0.0879315	7889	8.82738	0.982345	3877	5.33581	0.938533	333	1.72718	0.702936	-0.31797	-0.98491	3686	125	12129	15940
BHos2	RT-WGA	201607	No	BH	C_hk	tissue	301	26492990	0.00809339	0.0404293	0.050895	2.77349e-05	20745192	0.783045	BH		0.177632	0.0796771	7126	8.52893	0.978457	3233	5.51293	0.940658	285	1.14266	0.480776	-0.12753	-1.072	3198	127	9767	13092
ChLJ1511Da	WGA	201511	Yes	LJ	C_hk	tissue	250	9397658	8.9384e-06	2.89434e-05	0.000124925	0.000134686	9144544	0.973066	LJd	6684	0.0790567	0.444041	6886	8.18064	0.954002	11921	6.95625	0.942425	1022	4.55819	0.961407	-0.91736	-0.3354	32876	390	11192	44458
ChLJ1511Db	WGA	201511	Yes	LJ	C_hk	tissue	250	9837028	3.09036e-05	4.55422e-05	0.000448103	0.000483495	9444594	0.960106	LJd		0.0991875	0.34634	10111	9.42352	0.979435	13898	8.34205	0.986253	1249	4.29236	0.911397	-1.085	-0.33609	41259	427	12440	54126
ChLJ1511Dc	WGA	201511	Yes	LJ	C_hk	tissue	250	7713080	2.77451e-05	4.74519e-05	0.000252817	0.00012778	7462928	0.967568	LJd		0.0807138	0.394432	9803	8.60174	0.948315	11899	6.91457	0.95546	987	4.93446	0.979786	-0.9767	-0.33791	31236	399	10526	42161
ChLJ1511Ra	WTA	201511	Yes	LJ	C_hk	tissue	250	8207870	0.000403271	0.0143146	0.0059075	2.88454e-05	7731340	0.941942	LJr	1365	0.0245658	0.471495	229	4.72154	0.942823	1561	5.51929	0.941914	44	0.742147	0.41339	1.5716	-0.46051	1850	1442	1449	4741
ChLJ1511Rb	WTA	201511	Yes	LJ	C_hk	tissue	250	7799674	0.00256267	0.0564326	0.0464396	2.03027e-05	7085542	0.908441	LJr		0.0641734	0.0936159	202	4.59632	0.948381	1308	6.57357	0.974107	34	0.692921	0.398331	1.7132	-0.26359	1108	1181	713	3002
ChLJ1511Rc	WTA	201511	Yes	LJ	C_hk	tissue	250	6766042	0.0086473	0.113407	0.0803365	9.29016e-06	6359526	0.939918	LJr		0.0367917	0.126769	190	4.38026	0.927929	1492	5.83698	0.9519	25	0.720828	0.437358	1.5857	-0.30264	1501	1690	1192	4383
ChQZ1511Da	WGA	201511	Yes	BH	C_hk	tissue	250	17637090	8.95839e-06	3.87819e-05	4.28642e-05	1.54815e-06	16922006	0.959456	QZd	291	0.00539115	0.780494	717	6.8349	0.906669	2811	2.6368	0.764704	147	3.58236	0.919814	0.44556	0.97997	4406	473	1969	6848
ChQZ1511Db	WGA	201511	Yes	BH	C_hk	tissue	250	8189462	1.53856e-05	4.22494e-05	4.27379e-05	4.84088e-06	7927630	0.968028	QZd		0.00588955	0.738705	1223	8.69368	0.987293	2928	2.90885	0.764188	174	4.0269	0.95097	0.33007	0.90679	4972	315	2136	7423
ChQZ1511Dc	WGA	201511	Yes	BH	C_hk	tissue	250	6151112	2.40607e-05	5.52746e-05	5.20231e-05	0	5776732	0.939136	QZd		0.00175651	0.734814	887	7.85598	0.968775	1436	2.84304	0.760169	67	2.53378	0.767976	0.91272	1.4577	1927	235	899	3061
ChQZ1511Ra	WTA	201511	Yes	BH	C_hk	tissue	250	2729912	0.000179493	0.000597089	0.000648373	0	2433374	0.891375	QZr	336	0.00205974	0.468996	112	1.93765	0.628402	853	4.10534	0.862998	21	2.3211	0.83227	2.0105	0.35058	687	496	389	1572
ChQZ1511Rb	WTA	201511	Yes	BH	C_hk	tissue	250	9632852	9.48836e-05	0.000901083	0.000840872	0	8886266	0.922496	QZr		0.00392863	0.421504	199	1.4941	0.554604	1269	4.97039	0.917013	36	1.45324	0.651299	1.6432	0.41108	1248	595	692	2535
ChQZ1511Rc	WTA	201511	Yes	BH	C_hk	tissue	250	10863936	2.74302e-05	0.000291607	0.000776882	1.18807e-05	9426168	0.867657	QZr		0.00523513	0.326228	334	4.75255	0.932585	2184	5.13747	0.930412	94	1.32126	0.435919	1.0635	0.31147	3463	566	1624	5653
ChSZ1604Da	WGA	201604	Yes	SZ	C_hk	tissue	250	14659818	3.68354e-06	3.32883e-05	4.77496e-05	5.08736e-05	13424648	0.915745	SZd	7052	0.114368	0.513291	2215	9.29248	0.990838	7047	6.67262	0.980758	491	2.26127	0.713469	-0.74532	0.60248	21351	564	10198	32113
ChSZ1604Db	WGA	201604	Yes	SZ	C_hk	tissue	250	7751908	1.96081e-05	3.22501e-05	0.000157639	6.72088e-05	7465862	0.9631	SZd		0.219732	0.361681	11121	9.88644	0.996522	5770	6.90414	0.984392	359	2.69917	0.741254	-0.69513	0.76354	15687	359	7549	23595
ChSZ1604Dc	WGA	201604	Yes	SZ	C_hk	tissue	250	9491632	2.65497e-05	0.00010662	0.000193855	3.94687e-05	9013638	0.94964	SZd		0.105091	0.341978	10905	10.0411	0.995537	6233	6.90761	0.978649	429	3.03805	0.914707	-0.66273	0.61991	16471	540	7291	24302
ChSZ1604Ra	WTA	201604	Yes	SZ	C_hk	tissue	250	10989114	2.72997e-05	0.000691594	0.000696689	2.70955e-06	9742026	0.886516	SZr	813	0.3461	0.769815	220	0.0202793	0.00267383	1406	4.15395	0.821591	51	2.40003	0.734342	1.5926	0.88324	1415	788	771	2974
ChSZ1604Rb	WTA	201604	Yes	SZ	C_hk	tissue	250	5270640	4.62942e-05	0.000969901	0.00141842	0	4913794	0.932296	SZr		0.399308	0.738927	167	0.0276987	0.00385601	1161	4.85733	0.871275	29	2.14668	0.749879	1.8886	0.67206	1055	810	628	2493
ChSZ1604Rc	WTA	201604	Yes	SZ	C_hk	tissue	250	10027896	0.00119666	0.0206815	0.0112205	6.56715e-06	9327552	0.93016	SZr		0.486053	0.583398	182	0.355339	0.0883277	1583	5.03863	0.887557	32	0.65778	0.371051	1.6217	-0.0060863	1392	1489	1053	3934
ChTW1511Da	WGA	201511	Yes	HD	C_hk	tissue	250	4875822	7.34235e-05	6.60401e-05	0.000148898	0.000369415	4717956	0.967623	TWd	3278	0.171483	0.284045	10256	10.3706	0.996067	12381	9.48215	0.994315	1416	5.15169	0.974865	-1.0162	0.14613	48390	440	12804	61634
ChTW1511Db	WGA	201511	Yes	HD	C_hk	tissue	250	4091320	1.75982e-05	5.81719e-05	0.000338766	5.55209e-05	3953118	0.966221	TWd		0.0326706	0.508036	1734	8.10347	0.971095	6210	6.05971	0.944839	606	3.67472	0.883758	-0.53419	0.078753	14905	251	5341	20497
ChTW1511Dc	WGA	201511	Yes	HD	C_hk	tissue	250	4045706	3.31215e-05	7.01979e-05	0.000562572	7.64805e-05	3917362	0.968276	TWd		0.0467278	0.456372	4679	8.89182	0.977731	7612	6.66093	0.967488	658	4.84692	0.978338	-0.73514	0.18978	17195	333	6303	23831
ChTW1511Ra	WTA	201511	Yes	HD	C_hk	tissue	250	5955404	0.00440272	0.0674084	0.0452876	9.64406e-06	5684760	0.954555	TWr	959	0.121274	0.324542	196	1.95553	0.557552	1400	6.67156	0.981939	26	0.775647	0.434351	1.7565	-0.34141	1184	2047	912	4143
ChTW1511Rb	WTA	201511	Yes	HD	C_hk	tissue	250	13139988	4.2618e-06	7.13851e-05	0.000187519	2.18769e-05	11957368	0.909998	TWr		0.0303215	0.715184	420	4.55556	0.885941	2242	3.82469	0.867483	70	2.07579	0.800975	1.1009	-0.2791	2956	673	1507	5136
ChTW1511Rc	WTA	201511	Yes	HD	C_hk	tissue	250	12225784	2.99367e-05	0.000731405	0.00109817	3.87103e-05	10416666	0.852024	TWr		0.0242832	0.612246	806	6.3464	0.960841	2085	4.94416	0.932166	49	0.715726	0.419181	1.281	-0.32704	2568	900	1702	5170
ChYJ1509Da	WGA	201509	Yes	YJ	C_hk	tissue	250	55339890	2.32021e-05	3.86701e-05	0.000836286	0.000220949	53245940	0.962162	YJd	10629	0.129882	0.249659	15287	7.87133	0.9016	19101	8.63398	0.991973	1858	3.89972	0.880282	-0.79966	-0.21517	73219	882	21430	95531
ChYJ1509Db	WGA	201509	Yes	YJ	C_hk	tissue	250	8299488	4.89187e-05	0.000107236	0.00273752	0.000322035	8024780	0.966901	YJd		0.173229	0.167513	13005	10.3547	0.991116	14582	9.25497	0.983839	1351	3.48953	0.772609	-0.94813	-0.19503	45651	418	13793	59862
ChYJ1509Dc	WGA	201509	Yes	YJ	C_hk	tissue	250	6565504	3.35085e-06	3.83824e-05	0.000114843	0.000101481	6421286	0.978034	YJd		0.105202	0.375225	6775	8.29747	0.929989	10285	5.91121	0.860393	851	2.72592	0.647924	-0.58052	-0.14584	29786	348	11025	41159
ChYJ1509Ra	WTA	201509	Yes	YJ	C_hk	tissue	250	11789906	0.000162003	0.00378748	0.00914409	0.0011409	10583872	0.897706	YJr	1931	0.0634659	0.24593	281	3.77564	0.883488	1504	5.88142	0.965601	38	1.21036	0.651945	1.5439	-0.65282	1456	945	1029	3430
ChYJ1509Rb	WTA	201509	Yes	YJ	C_hk	tissue	250	12728468	0.00301545	0.0414042	0.0403296	2.14778e-05	11642730	0.9147	YJr		0.015579	0.104887	510	4.24111	0.917617	2118	5.8161	0.945543	89	0.550619	0.284239	1.241	-0.19932	2718	1306	1596	5620
ChYJ1509Rc	WTA	201509	Yes	YJ	C_hk	tissue	250	8605602	0.000682579	0.0086374	0.0361425	2.03895e-05	7624392	0.88598	YJr		0.0133538	0.256659	218	2.81992	0.641436	1648	5.22279	0.876846	33	0.940835	0.539828	1.5495	-0.59484	1951	1474	1887	5312
ChZH1511Da	WGA	201511	Yes	ZH	C_hk	tissue	250	29369916	0.000104529	3.56147e-05	0.000434458	0.000333384	28037574	0.954636	ZHd	18090	0.103466	0.475084	16759	10.0324	0.992855	18459	7.92134	0.987003	1996	5.19937	0.971502	-0.97648	0.016383	89725	1078	22468	113271
ChZH1511Db	WGA	201511	Yes	ZH	C_hk	tissue	250	15826460	4.92846e-06	3.07081e-05	0.00012397	0.000191464	15303386	0.966949	ZHd		0.0633387	0.424022	4370	9.4967	0.991557	14099	8.10563	0.987794	1606	4.42537	0.938885	-0.83022	-0.013589	59302	590	15907	75799
ChZH1511Dc	WGA	201511	Yes	ZH	C_hk	tissue	250	15997396	5.75094e-06	2.37539e-05	0.000115394	5.38496e-05	15503908	0.969152	ZHd		0.0276277	0.598732	5637	7.96632	0.952178	9790	5.53072	0.930067	840	4.87328	0.977955	-0.81088	0.095236	25938	424	9802	36164
ChZH1511Ra	WTA	201511	Yes	ZH	C_hk	tissue	250	7935526	0.000119967	0.00874599	0.00421094	1.42633e-05	7399842	0.932495	ZHr	1043	0.0895303	0.584521	334	2.10452	0.638119	1931	6.16051	0.953686	63	0.753841	0.36939	1.4067	-0.34419	2121	1901	1418	5440
ChZH1511Rb	WTA	201511	Yes	ZH	C_hk	tissue	250	16755844	4.08216e-05	0.00382959	0.00309456	2.09211e-05	15192252	0.906684	ZHr		0.127193	0.567239	276	2.46956	0.697606	1914	6.43836	0.975964	40	0.870036	0.517598	1.4573	-0.50357	1930	2080	1311	5321
ChZH1511Rc	WTA	201511	Yes	ZH	C_hk	tissue	250	15491198	1.54927e-05	0.000749329	0.000735514	0.000413382	12320246	0.795306	ZHr		0.019789	0.554763	466	1.85896	0.414801	2185	4.61517	0.926884	89	1.2553	0.559007	1.2194	-0.37256	2715	1125	1830	5670
GX170519	RT-WGA	201705	No	BH	C_hk	hemolymph	150	98439018	0.000447871	0.00101173	0.000977905	0.00650897	95973034	0.974949	GX	55320	0.162093	0.473317	18209	9.18708	0.984252	22446	10.1075	0.987267	3679	5.07836	0.977985	-1.7146	-0.048433	38020	133	234376	272529
K1ZY170525	RT-WGA	201705	Yes	HD	C_hk	hemolymph	150	126290460	0.00534566	0.0144055	0.012134	0.00268384	120654628	0.955374	KZY	146989	0.250013	0.325986	18527	9.60772	0.996019	31979	11.1697	0.996707	4704	6.00969	0.99024	-1.8337	-0.32769	54203	408	348782	403393
K2ZY170525	RT-WGA	201705	Yes	HD	C_hk	hemolymph	150	133509746	0.00142993	0.00440058	0.00399435	0.00473422	129353322	0.968868	KZY		0.501664	0.394008	18835	9.58004	0.993786	28776	10.8673	0.995684	4330	6.35829	0.99435	-1.8144	-0.23163	51778	111	322998	374887
ML-1	RT-WGA	201605	Yes	SZ	C_hk	tissue	150	9528788	0.00322391	0.00820419	0.00886807	0.00028839	8613594	0.903955	ML	3446	0.0655109	0.341968	8083	9.39898	0.993095	3817	4.05649	0.901944	305	3.05839	0.878706	-0.82634	1.1506	4679	122	15613	20414
ML-2	RT-WGA	201605	Yes	SZ	C_hk	tissue	150	14561514	0.0296037	0.0835522	0.0706207	3.37591e-05	11264418	0.773575	ML		0.0329731	0.0780507	3816	9.19715	0.99262	1619	5.37221	0.957827	113	1.46122	0.652274	0.20168	1.3383	1677	93	5404	7174
ML-3	RT-WGA	201605	Yes	SZ	C_hk	tissue	150	11077982	0.00125131	0.00239665	0.00512079	0.00042723	10147174	0.915977	ML		0.0418083	0.380091	8111	9.45365	0.993085	3758	4.03252	0.909077	297	2.70937	0.858503	-0.87234	1.1467	5108	118	16009	21235
T2S170523	RT-WGA	201705	No	TS	C_hk	hemolymph	150	150205164	0.000257301	0.000633028	0.000985918	0.00323172	142335908	0.94761	T2S	63251	0.16719	0.373939	19122	10.8264	0.995807	29499	12.1537	0.998965	4782	5.70074	0.984502	-1.9267	-0.16036	50711	182	301595	420178
T4S170523	RT-WGA	201705	No	TS	C_hk	hemolymph	150	143492546	0.000644187	0.000614248	0.000651532	0.00337643	138461414	0.964938	T4S	65609	0.111272	0.450242	18735	9.99972	0.989773	35017	12.9113	0.999668	4846	5.83998	0.980658	-2.2138	-0.29828	58654	208	379461	292340
T5S170523	RT-WGA	201705	No	TS	C_hk	hemolymph	150	124558432	4.59062e-05	0.00018507	0.000166894	0.00420391	119927954	0.962825	T5S	58684	0.112768	0.450168	18908	10.2763	0.993043	34560	12.6491	0.999464	4785	5.9138	0.985201	-2.2051	-0.24046	56533	112	363533	278488
T6S170523	RT-WGA	201705	No	TS	C_hk	hemolymph	150	97025222	0.00660686	0.0290419	0.022806	0.000751935	87632712	0.903195	T6S	30859	0.27494	0.154983	18714	10.0799	0.974855	29621	10.1982	0.989871	3924	5.83356	0.990199	-1.627	-0.12622	45765	420	246155	245266
T8S170523	RT-WGA	201705	Yes	TS	C_hk	hemolymph	150	77776636	0.000284456	0.000339614	0.000328093	0.00220704	74773078	0.961382	T8S	29964	0.392982	0.364071	17253	9.20224	0.991549	27943	10.3516	0.996729	4176	5.2068	0.977978	-1.8678	-0.17868	37996	122	240370	248488
ZH170511	RT-WGA	201705	No	ZH	C_hk	hemolymph	150	99775942	0.0247915	0.0752018	0.0660613	0.000215844	86381646	0.865756	ZH	21190	0.136839	0.115113	17874	11.2977	0.997951	929	6.86137	0.981006	3182	5.31001	0.973048	0.52422	-2.2254	34927	185	210154	245266
dCh	dsDNA	201406	No	BH	C_hk	tissue	125	13508672	0.000678379	0.00260159	0.0826274	0	12581270	0.931348	dCh	23	0.000103786	0.00517337	N/A	N/A	N/A	N/A	N/A	N/A	N/A	N/A	N/A	N/A	N/A	N/A	N/A	N/A	N/A
os	dsDNA	201807	Yes	N/A	C_hk	tissue	150	17232644	0.00381824	0.00240762	0.095169	5.54923e-05	14372206	0.83401	os	342	0.0141988	0.0528992	N/A	N/A	N/A	N/A	N/A	N/A	N/A	N/A	N/A	N/A	N/A	N/A	N/A	N/A	N/A
HSd	WGA	201907	Yes	GZ(ZH)	C_hk	tissue	150	428172937	N/A	N/A	N/A	N/A	426066507	0.99508	HSd	66320	N/A	N/A	N/A	N/A	N/A	N/A	N/A	N/A	N/A	N/A	N/A	N/A	N/A	N/A	N/A	N/A	N/A
HSr	WTA	201907	Yes	GZ(ZH)	C_hk	tissue	150	93030579	N/A	N/A	N/A	N/A	90069185	0.968168	HSr	110	N/A	N/A	N/A	N/A	N/A	N/A	N/A	N/A	N/A	N/A	N/A	N/A	N/A	N/A	N/A	N/A	N/A
Total	N/A	N/A	N/A	N/A	N/A	N/A	N/A	2108066294	0.00223342	0.0124	0.0147	0.000638	1998879940	0.9255	N/A	728784*	0.1163	0.3902	N/A	N/A	N/A	N/A	N/A	N/A	N/A	N/A	N/A	N/A	N/A	N/A	N/A	N/A	N/A
*including 128,842 contigs which were assambled from the pool of all unmapped reads of each assambly groups
